# Supplementary material
Source: PubMed Central journal article supplement (PMC6285187)
Supplement: en-14-1619.pdf [file en-14-1619.pdf]

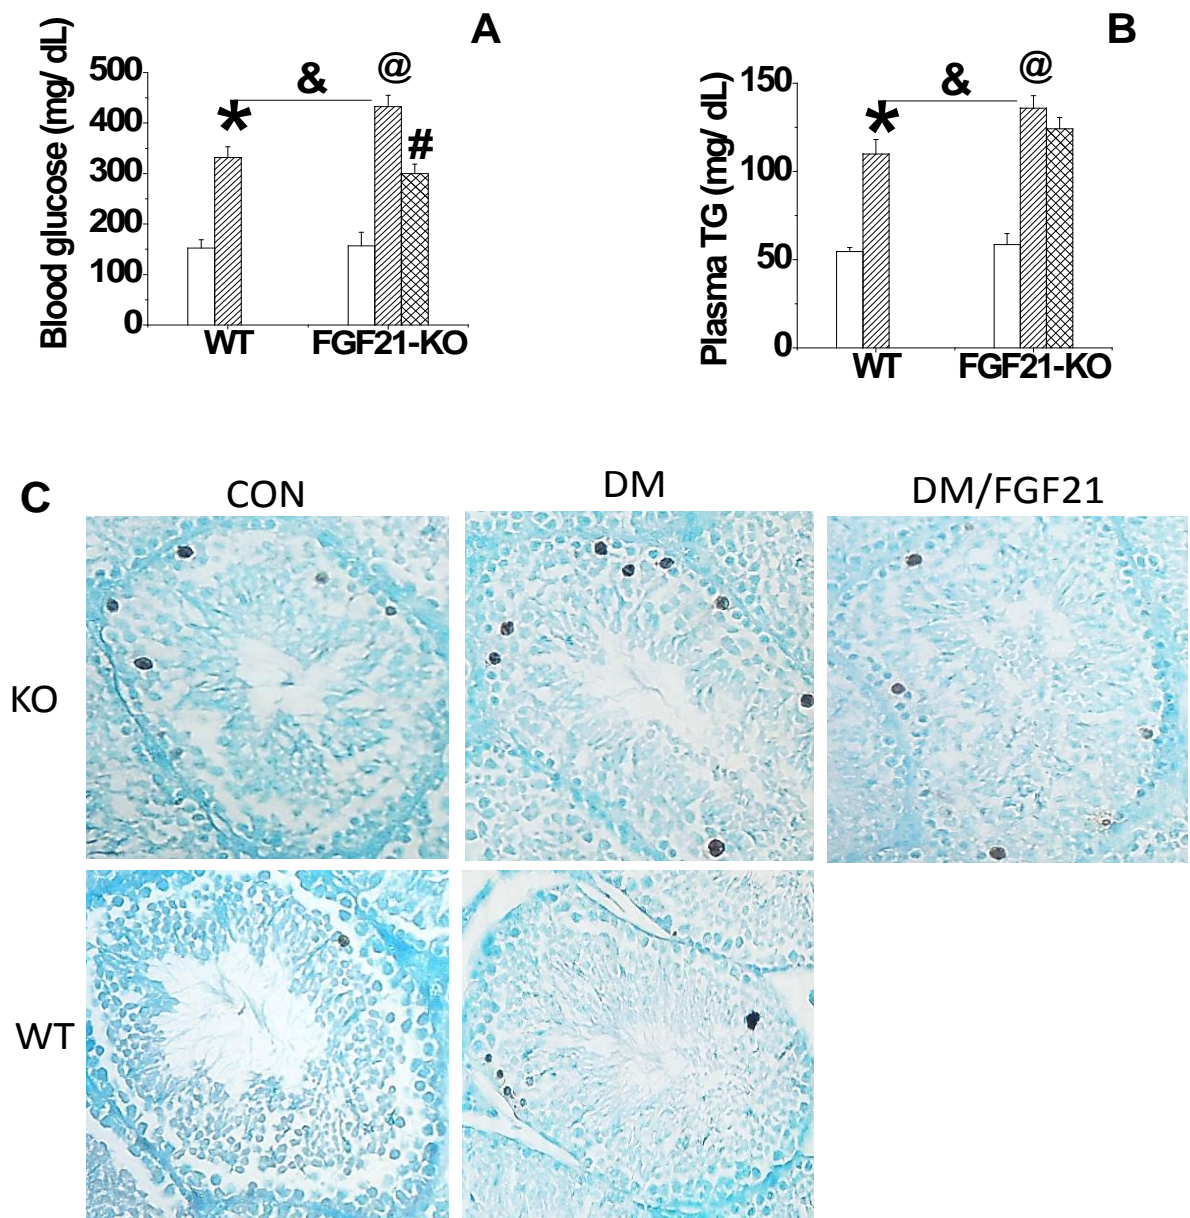

**Supplemental Figure 1:** Male and 10 week old WT and FGF21-KO mice were treated with STZ at 200 mg/kg body-weight. Three days later blood glucose was measured. Hyperglycemic mice and age-matched control mice were treated with FGF21 or saline for 10 days. A: Fasting blood glucose levels, collected before sacrificing; B: Plasma triglyceride measured after mice were sacrificed; C: testes tissue was staining for apoptotic cell death with TUNEL. \*  $p < 0.05$  vs. WT-CON; &  $p < 0.05$  vs. WT-DM; @  $p < 0.05$  vs. KO-CON; #  $p < 0.05$  vs. KO-DM.

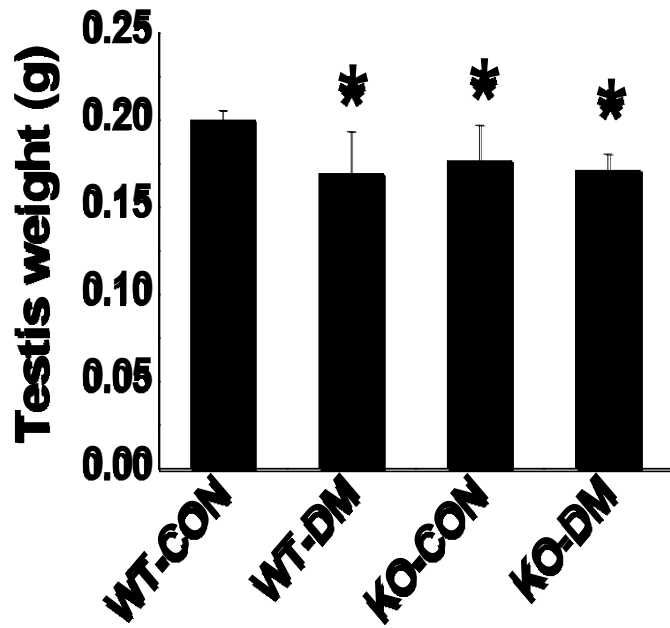

**Supplemental Figure 2:** Testicular weight of mice that were sacrificed at 2 months after diabetes onset induced by STZ. \*  $p < 0.05$  vs. WT-CON.
